# Supplementary material
Source: PubMed Central journal article supplement (PMC4129399)
Supplement: mmc1.pdf [file mmc1.pdf]

The American Journal of Human Genetics, Volume 95

Supplemental Data

**Exome Sequencing Identifies  
a Recurrent De Novo *ZSWIM6* Mutation  
Associated with Acromelic Frontonasal Dysostosis**

Joshua D. Smith, Anne V. Hing, Christine M. Clarke, Nathan M. Johnson, Francisco A. Perez, Sarah S. Park, Jeremy A. Horst, Brig Mecham, Lisa Maves, Deborah A. Nickerson, University of Washington Center for Mendelian Genomics, Michael L. Cunningham

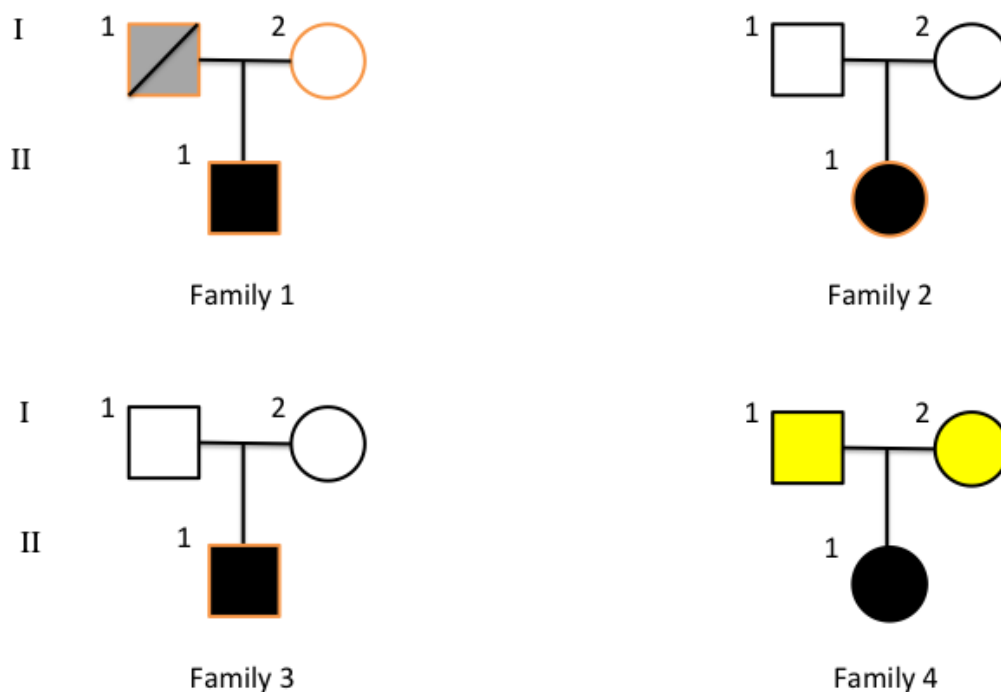

**Figure S1. Pedigrees of AFND Families**

Individuals that have orange trim were selected for whole exome sequencing. Individual I.1 in Family 1 (gray shading) was previously described as being mildly affected. Individual II.1 in Family 1 and Individual II.1 in Family 3 correspond to Cases 1 and 2, respectively in Hing et al.<sup>1</sup> Parents of Individual II.1 in Family 4 are unknown as patient was adopted (yellow shading) and, therefore, cannot be screened for the ZSWIM6 mutation.

|        |      |                                                     |      |
|--------|------|-----------------------------------------------------|------|
| ZSWIM6 | 1138 | LRQLLDATIGAYINTTTHSRLTHISPRHYSEFIEFLSKARETFMLAHDGHI | 1187 |
| ZSWIM5 | 1108 | LRQLLDATINAYINTTTHSRLTHISPRHYGEFIEFLSKARETFLLPQDGHL | 1157 |
| ZSWIM4 | 912  | LCQLLDAAVTAYITTSHSRLTHISPRHYGDFIEFLGKARETFLLAPDGHL  | 961  |

### Figure S2. Conservation of Variant Region in Gene Family Members

The aligned 50 amino acid window that spans the ZSWIM6 p. Arg1163Trp substitution is highly conserved in two ZSWIM family members ZSWIM5 and ZSWIM4. Divergent residues are marked in red and conservative substitutions are marked in green. The two paralogs have high homology across the protein suggesting that they resulted from a recent expansion of the genome as determined by evolutionary conservation.

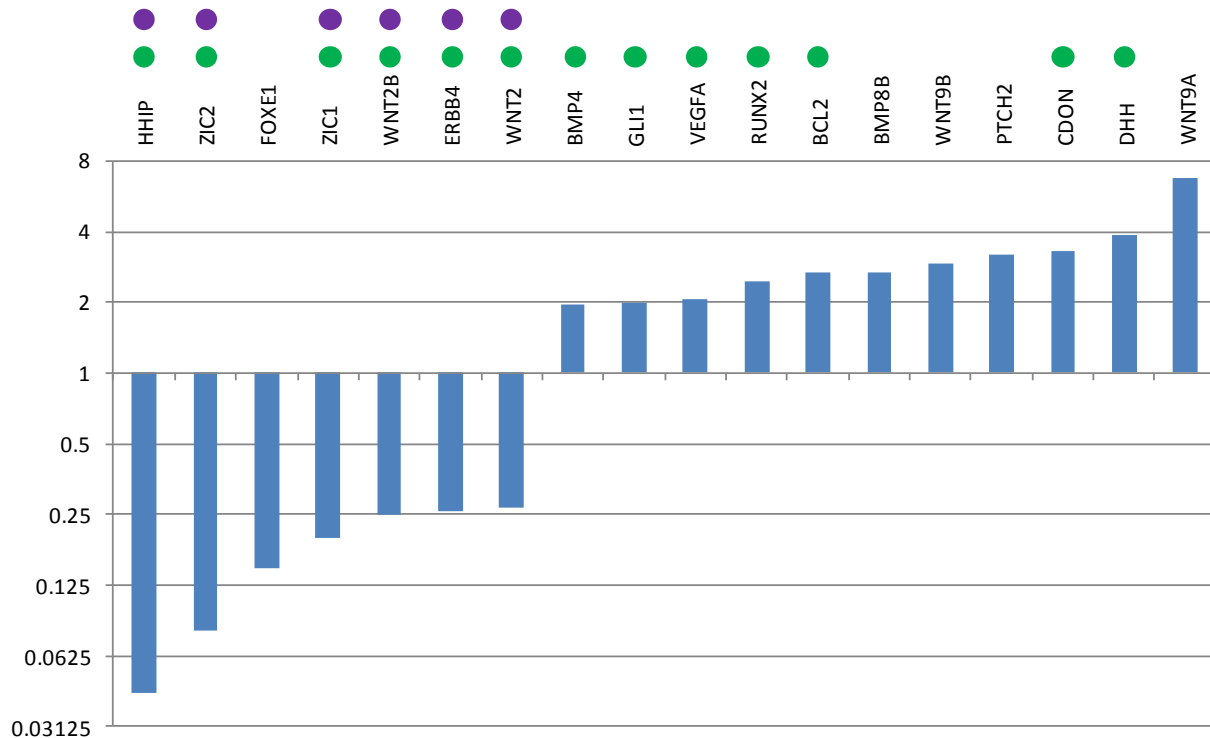

**Figure S3. ZSWIM6 Mutation is Associated with Dysregulation of Hedgehog Pathway**

### Transcripts

Primary osteoblast cell lines demonstrated eighteen transcripts (*HHIP* [MIM 606178], *ZIC2* [MIM 603073], *ZIC1* [MIM 600470], *WNT2B* [MIM 601968], *ERBB4* [MIM 600543], *WNT2* [MIM 147870], *BMP4* [MIM 112262], *GLI1* [MIM 165220], *VEGFA* [MIM 192240], *RUNX2* [MIM 600211], *BCL2* [MIM 151430], *CDON* [MIM 608707] and *DHH* [MIM 605423]) with greater than 1.5 fold up or down regulation in two AFND cases relative to five controls. Thirteen of these transcripts (72%, green dot) support that *ZSWIM6* c.3487C>T results in activation of the Hedgehog pathway with increased expression of activators and reduced expression of repressors.<sup>1-6</sup> Parallel qRT-PCR using two cases and two control primary fibroblast lines demonstrated concurrence in the six down regulated transcripts (purple dot) further supporting our hypothesis that the *ZSWIM6* c.3487C>T mutation results in partial activation of the Hedgehog pathway.

**Table S1. Clinical Features of Individuals with AFND**

| <b>Brain</b>                           | <b>Individual 1</b>    | <b>Individual 2</b>                                         | <b>Individual 3</b> | <b>Individual 4</b>  |
|----------------------------------------|------------------------|-------------------------------------------------------------|---------------------|----------------------|
| Periventricular nodular heterotopia    | Not present            | Left temporal horn                                          | Not present         | Not present          |
| Ventriculomegaly                       | Mild                   | Not present                                                 | Not present         | Mild                 |
| Choroid plexus cyst                    | Present                | Present                                                     | Not present         | Not present          |
| Marked dilated perivascular spaces     | Not present            | Present - versus periventricular cysts                      | Not present         | Not present          |
| Corpus callosum                        | Hypoplastic            | Aplastic                                                    | Normal              | Normal               |
| Septum pellucidum                      | Deficient              | Normal                                                      | Normal              | Normal               |
| Cavum septum pellucidum                | Not present            | Not present                                                 | Present             | Not present          |
| Calcification/ossification of the falx | Present                | Present                                                     | Present             | Minimal              |
| Interhemispheric lipoma                | Tubulonodular - large* | Tubulonodular                                               | Tubulonodular       | Small                |
| Olfactory bulbs                        | Absent                 | Absent                                                      | Unable to assess    | Unable to assess     |
| Pituitary                              | Enlarged sella         | Absent adenohypophysis                                      | Enlarged sella      | Enlarged sella       |
| Other                                  |                        | Fenestrated basilar artery; persistent falcine venous sinus |                     | Retrocerebellar cyst |

| <b>Eyes</b>               |      |      |                  |         |
|---------------------------|------|------|------------------|---------|
| Corneal Dermoid Cyst      | None | Left | None             | None    |
| Glaucoma                  | Left | None | None             | Unknown |
| Myopia                    | None | Yes  | Yes              | Unknown |
| Optic Nerve Hypoplasia    | None | None | Right, segmental | Unknown |
| Persistent primary vitrea | None | Yes  | None             | Unknown |

| <b>Craniofacial</b> |     |     |     |     |
|---------------------|-----|-----|-----|-----|
| Hypertelorism       | Yes | Yes | Yes | Yes |
| Ptosis/Telecanthus  | Yes | Yes | Yes | Yes |
| Median Facial Cleft | Yes | Yes | Yes | Yes |

|                                   |             |                        |             |             |
|-----------------------------------|-------------|------------------------|-------------|-------------|
| Separation of Nostrils            | Yes         | Yes                    | Yes         | Yes         |
| Cleft palate                      | Complete    | Submucous cleft palate | Absent      | Absent      |
| Parietal Foramina                 | Bilateral   | Bilateral              | Bilateral   | Absent      |
| Persistent craniopharyngeal canal | Not present | Not present            | Not present | Present     |
| Canalis basilaris medianus        | Not present | Present                | Not present | Not present |
| Vertical clivus                   | Present     | Present                | Present     | Absent      |

|                                        |                 |      |           |         |
|----------------------------------------|-----------------|------|-----------|---------|
| <b>Limb</b>                            |                 |      |           |         |
| Preaxial polydactyly - Lower extremity | Right           | Left | Bilateral | Left    |
| Tibial Hypoplasia                      | Right           | Mild | Right     | Absent  |
| Patellar Hypoplasia                    | Right (aplasia) | Left | Right     | Unknown |
| Additional abnormalities               |                 |      |           |         |
| Hypopituitarism                        | Yes             | Yes  | Absent    | Unknown |
| Cryptorchidism                         | Yes             | N/A  | Normal    | N/A     |

**Imaging Studies Reviewed**

**Head CT and MRI**

**Head CT and MRI**

**Head CT**

**Head CT**

\* Interhemispheric lipoma is contiguous with the floor of the anterior cranial fossa.

### **Table S1. Clinical Features of Individuals with AFND**

Clinical phenotyping, including computed tomography and magnetic resonance imaging, confirmed classic findings of AFND and identified several new phenotypic features in our four probands. The cases demonstrated variable classic features of frontonasal dysplasia, parietal foramina and tibial hemimelia. In addition, interhemispheric lipoma, calcification of the falx, vertical clivus, enlargement of the sella turcica and hypopituitarism were the most consistent additional findings.

**Table S2. Orthologous Proteins with Highest Homology to ZSWIM6 Domain**

| <b>Accession id</b> | <b>Species</b>                  |
|---------------------|---------------------------------|
| NP_065979           | Homo sapiens                    |
| XP_004275235        | Orcinus orca                    |
| NP_663431           | Mus musculus                    |
| XP_004416075        | Odobenus rosmarus divergens     |
| XP_004664973        | Jaculus jaculus                 |
| XP_001234010        | Gallus gallus                   |
| XP_005281095        | Chrysemys picta bellii          |
| XP_005489834        | Zonotrichia albicollis          |
| XP_004862962        | Heterocephalus glaber           |
| XP_004678517        | Condylura cristata              |
| XP_004583864        | Ochotona princeps               |
| XP_004374643        | Trichechus manatus latirostris  |
| XP_005558916        | Macaca fascicularis             |
| XP_003899762        | Papio anubis                    |
| XP_003827517        | Pan paniscus                    |
| ELW66262            | Tupaia chinensis                |
| XP_535247           | Canis lupus familiaris          |
| XP_004789987        | Mustela putorius furo           |
| XP_005060742        | Ficedula albicollis             |
| XP_002745001        | Callithrix jacchus              |
| XP_004058851        | Gorilla gorilla gorilla         |
| XP_002916338        | Ailuropoda melanoleuca          |
| XP_003926003        | Saimiri boliviensis boliviensis |
| XP_005604291        | Equus caballus                  |
| XP_003981056        | Felis catus                     |
| ELK17704            | Pteropus alecto                 |
| XP_004608592        | Sorex araneus                   |
| ELR52973            | Bos mutus                       |
| XP_002696357        | Bos taurus                      |
| EPQ02547            | Myotis brandtii                 |

|              |                            |
|--------------|----------------------------|
| XP_004423086 | Ceratotherium simum simum  |
| XP_005654279 | Sus scrofa                 |
| XP_006789860 | Neolamprologus brichardi   |
| XP_005392704 | Chinchilla lanigera        |
| ERE85311     | Cricetulus griseus         |
| XP_005694723 | Capra hircus               |
| XP_003974842 | Takifugu rubripes          |
| XP_004072276 | Oryzias latipes            |
| XP_005152146 | Melopsittacus undulatus    |
| XP_004017167 | Ovis aries                 |
| XP_002188354 | Taeniopygia guttata        |
| XP_004703761 | Echinops telfairi          |
| NP_001129959 | Danio rerio                |
| XP_002934254 | Xenopus tropicalis         |
| XP_005432754 | Falco cherrug              |
| XP_002815636 | Pongo abelii               |
| EPY75632     | Camelus ferus              |
| XP_005240692 | Falco peregrinus           |
| XP_005422070 | Geospiza fortis            |
| XP_005720129 | Pundamilia nyererei        |
| XP_004566964 | Maylandia zebra            |
| XP_005459722 | Oreochromis niloticus      |
| XP_005319644 | Ictidomys tridecemlineatus |
| XP_004458914 | Dasypus novemcinctus       |
| XP_003462766 | Cavia porcellus            |
| EMP39970     | Chelonia mydas             |
| XP_005065620 | Mesocricetus auratus       |
| XP_006224073 | Rattus norvegicus          |
| XP_005356822 | Microtus ochrogaster       |
| XP_004623121 | Octodon degus              |
| CAG05288     | Tetraodon nigroviridis     |
| XP_005500446 | Columba livia              |



|              |                                      |
|--------------|--------------------------------------|
| XP_005021162 | <i>Anas platyrhynchos</i>            |
| XP_005521159 | <i>Pseudopodoces humilis</i>         |
| XP_003266152 | <i>Nomascus leucogenys</i>           |
| XP_003415610 | <i>Loxodonta africana</i>            |
| XP_513126    | <i>Pan troglodytes</i>               |
| XP_004318103 | <i>Tursiops truncatus</i>            |
| XP_003801268 | <i>Otolemur garnettii</i>            |
| XP_002715723 | <i>Oryctolagus cuniculus</i>         |
| XP_003759438 | <i>Sarcophilus harrisi</i>           |
| ELK26042     | <i>Myotis davidii</i>                |
| XP_003216452 | <i>Anolis carolinensis</i>           |
| NP_001090431 | <i>Xenopus laevis</i>                |
| ELU00951     | <i>Capitella teleta</i>              |
| XP_789113    | <i>Strongylocentrotus purpuratus</i> |
| XP_005101541 | <i>Aplysia californica</i>           |
| XP_975534    | <i>Tribolium castaneum</i>           |
| XP_001661402 | <i>Aedes aegypti</i>                 |
| XP_319218    | <i>Anopheles gambiae</i>             |
| EDS41857     | <i>Culex quinquefasciatus</i>        |
| XP_003213507 | <i>Meleagris gallopavo</i>           |
| XP_001640202 | <i>Nematostella vectensis</i>        |
| XP_002126311 | <i>Ciona intestinalis</i>            |
| XP_002114866 | <i>Trichoplax adhaerens</i>          |
| EEB16267     | <i>Pediculus humanus corporis</i>    |
| EEC14250     | <i>Ixodes scapularis</i>             |
| XP_001952608 | <i>Acyrtosiphon pisum</i>            |
| XP_003747218 | <i>Metaseiulus occidentalis</i>      |
| EFV54576     | <i>Trichinella spiralis</i>          |
| EHJ66570     | <i>Danaus plexippus</i>              |
| EKC18195     | <i>Crassostrea gigas</i>             |
| ENN79439     | <i>Dendroctonus ponderosae</i>       |
| XP_004933519 | <i>Bombyx mori</i>                   |

|              |                     |
|--------------|---------------------|
| XP_002153837 | Hydra vulgaris      |
| GAA55992     | Clonorchis sinensis |

## **Table S2. Orthologous Proteins with Highest Homology to ZSWIM6 Domains**

Ninety-seven orthologous metazoan proteins were aligned with Human ZSWIM6 and >75% conservation was seen from amino acid residues 269-1215.

### **Supplemental References**

1. **Chuang, P.T., Kawcak, T., and McMahon, A.P. (2003). Feedback control of mammalian Hedgehog signaling by the Hedgehog-binding protein, Hip1, modulates Fgf signaling during branching morphogenesis of the lung. *Genes Dev* 17, 342-347.**
2. **Chan, D.W., Liu, V.W., Leung, L.Y., Yao, K.M., Chan, K.K., Cheung, A.N., and Ngan, H.Y. (2011). Zic2 synergistically enhances Hedgehog signalling through nuclear retention of Gli1 in cervical cancer cells. *The Journal of pathology* 225, 525-534.**
3. **Rohr, K.B., Schulte-Merker, S., and Tautz, D. (1999). Zebrafish zic1 expression in brain and somites is affected by BMP and hedgehog signalling. *Mechanisms of development* 85, 147-159.**
4. **Zhong, J., Chen, S., Xue, M., Du, Q., Cai, J., Jin, H., Si, J., and Wang, L. (2012). ZIC1 modulates cell-cycle distributions and cell migration through regulation of sonic hedgehog, PI(3)K and MAPK signaling pathways in gastric cancer. *BMC cancer* 12, 290.**
5. **Bonifas, J.M., Pennypacker, S., Chuang, P.T., McMahon, A.P., Williams, M., Rosenthal, A., De Sauvage, F.J., and Epstein, E.H., Jr. (2001). Activation of expression of hedgehog target genes in basal cell carcinomas. *The Journal of investigative dermatology* 116, 739-742.**
6. **Gotschel, F., Berg, D., Gruber, W., Bender, C., Eberl, M., Friedel, M., Sonntag, J., Rungeler, E., Hache, H., Wierling, C., et al. (2013). Synergism between Hedgehog-GLI and EGFR signaling in Hedgehog-responsive human medulloblastoma cells induces downregulation of canonical Hedgehog-target genes and stabilized expression of GLI1. *PLoS one* 8, e65403.**
